# Supplementary material for: Novel polystyrene-based nanocomposites by phosphorene dispersion
Source: Royal Society of Chemistry journal article supplement (doi:10.1039/c6ra10133j), 2016-01-01
Supplement: c6ra10133j1.pdf [file c6ra10133j1.pdf]

Electronic Supporting Information

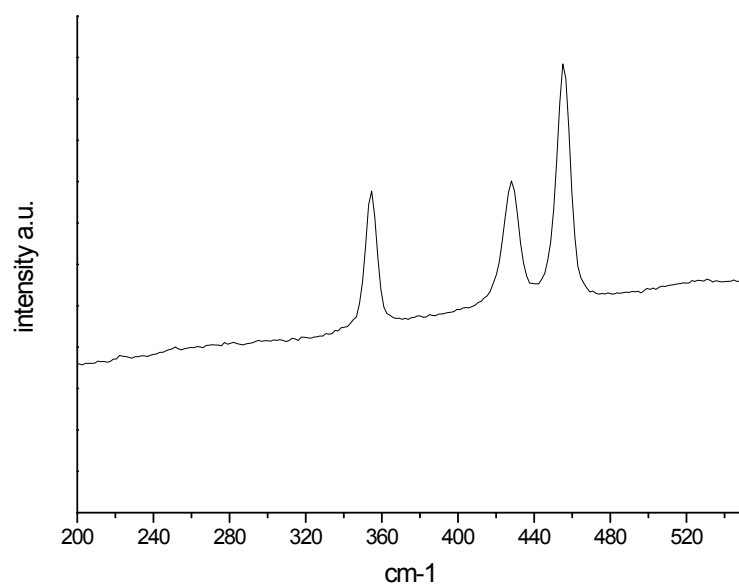

**SF1:** Raman spectrum of 2D BP dried

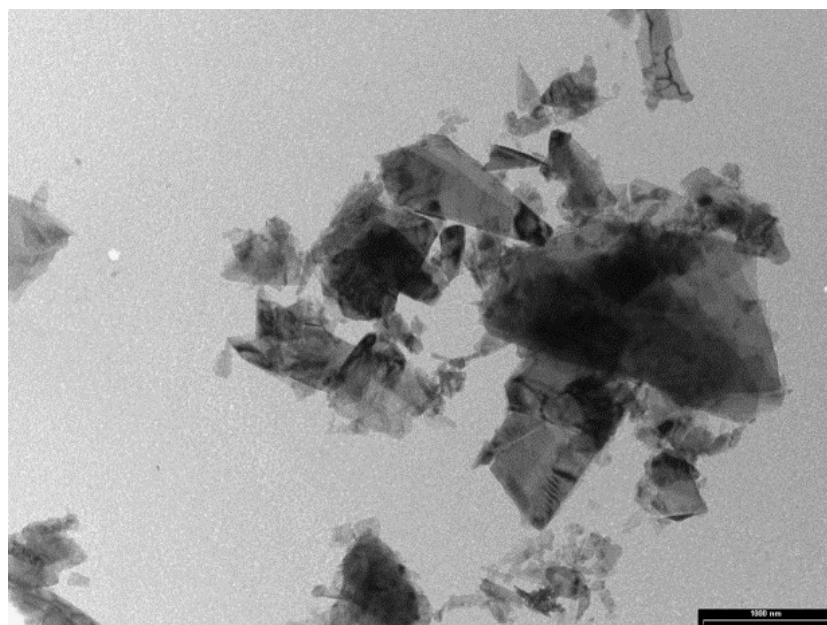

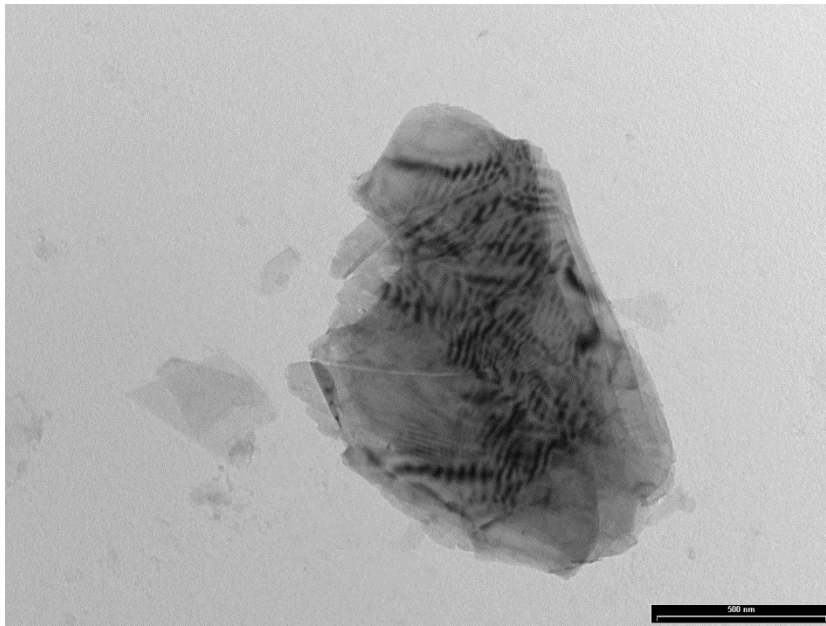

**SF2:** Bright-field TEM images of dried 2D BP

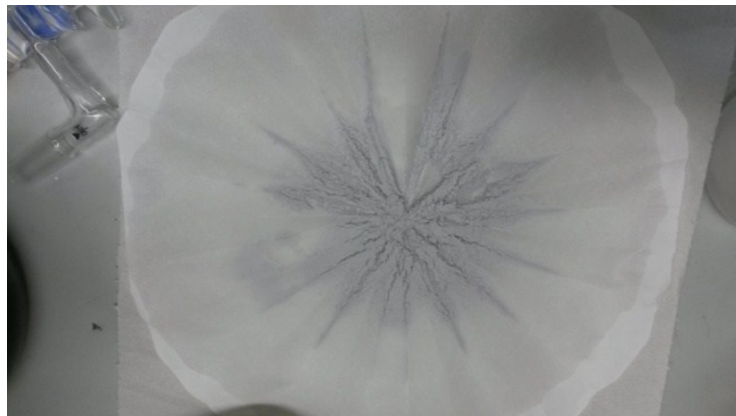

**SF3:** Powdery composite (PS1)'s picture as obtained by solutions blending and co-precipitation approach

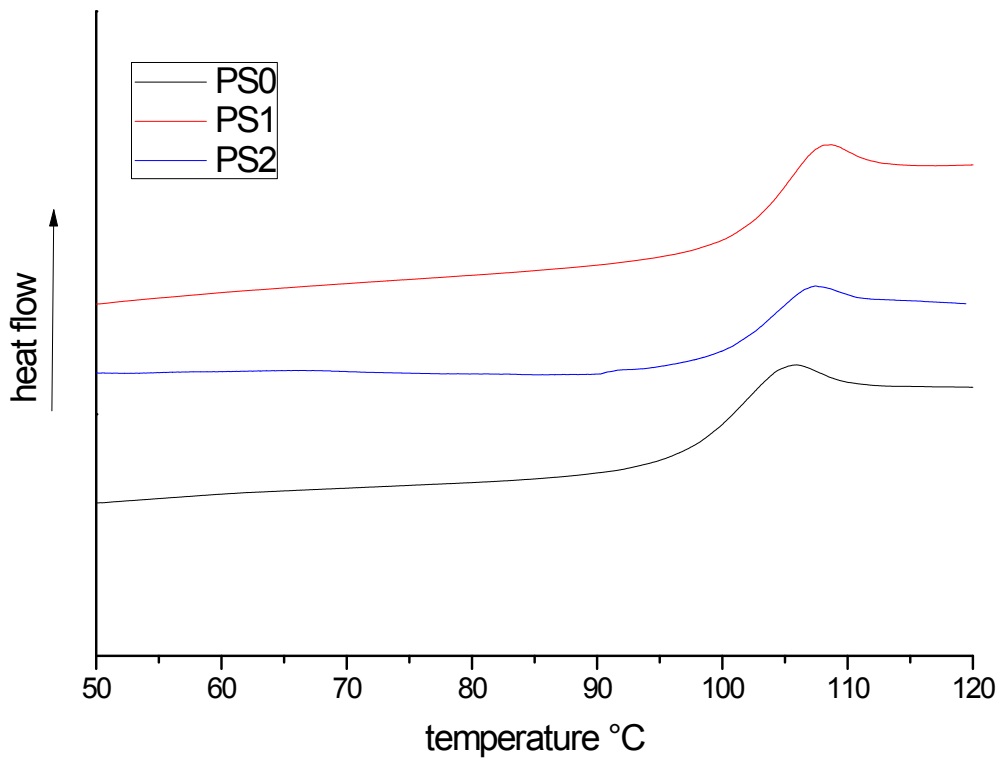

**SF4:** DSC curves of blank experiment (PS0) and composites with 2D BP nanolayers (samples PS1 and PS2)

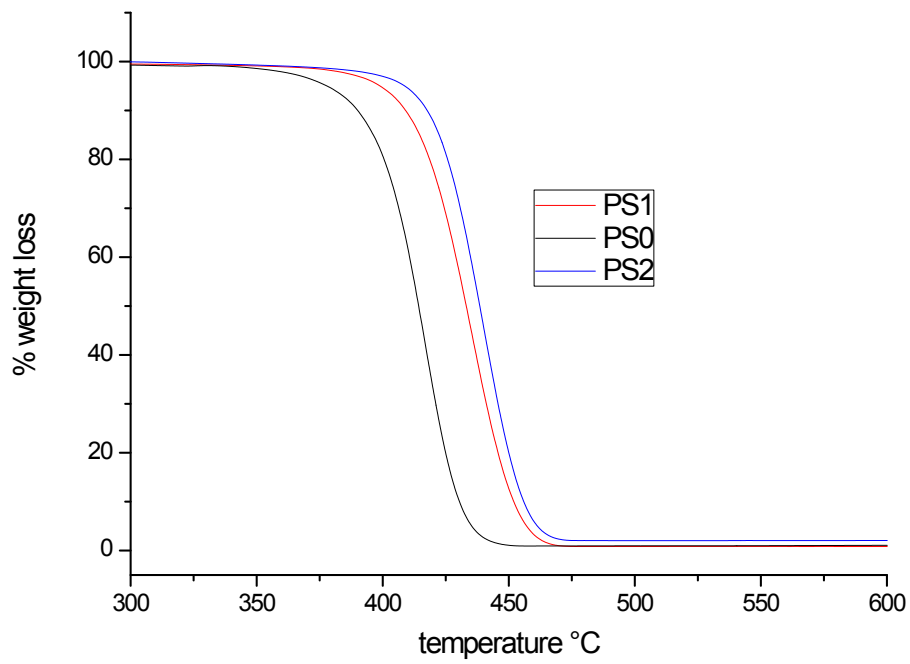

**SF5:** TGA curves of blank experiment (PS0) and composites with 2D BP nanolayers (samples PS1 and PS2)

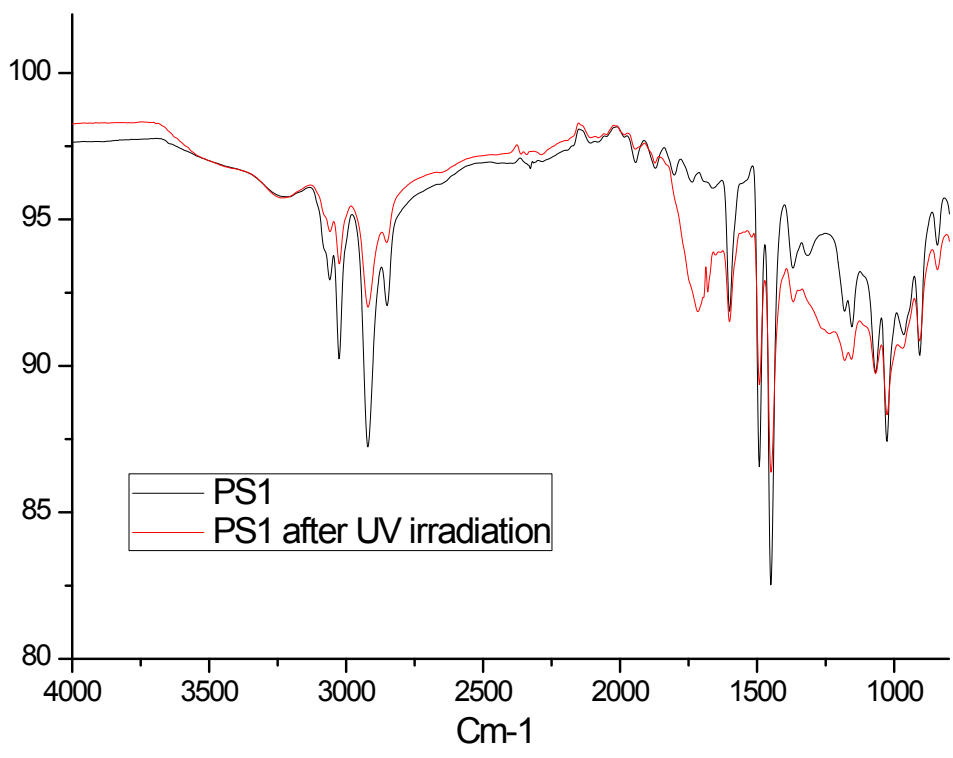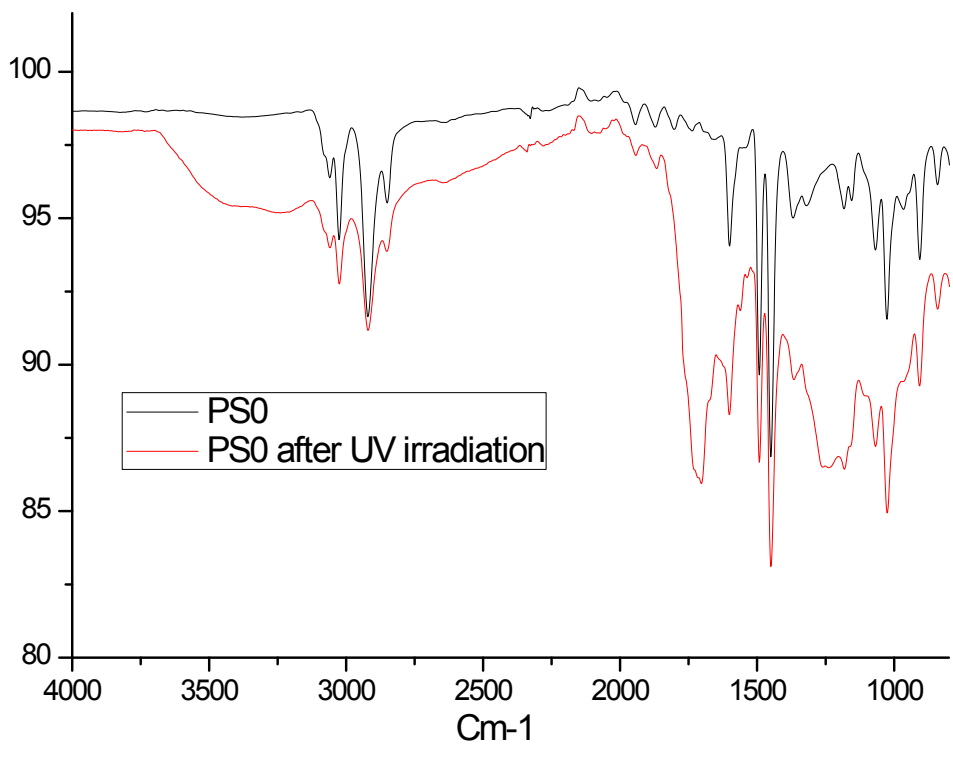

SF6: ATR Spectra of samples PS0 and PS1 before and after UV irradiation
